# Supplementary material for: Species Identification and In Vitro Antifungal Susceptibility of Paecilomyces/Purpureocillium Species Isolated from Clinical Respiratory Samples: A Multicenter Study
Source: MDPI journal article supplement (doi:10.3390/jof8070684), 2022-06-29
Supplement: s1 [file s1]

**Table S1.** Concordance between MADLI-TOF and DNA gene sequencing identification.

| DNA gene sequencing<br>identification<br>ITS | % of correct identification at<br>species level by MALDI-TOF<br>MS |
|----------------------------------------------|--------------------------------------------------------------------|
| <i>Purpureocillium lilacinum</i> (n=28)      | 100%                                                               |
| <i>Paecilomyces variotii</i> (n=26)          | 96%                                                                |
| <i>Paecilomyces maximus</i> (n=16)           | 94%                                                                |

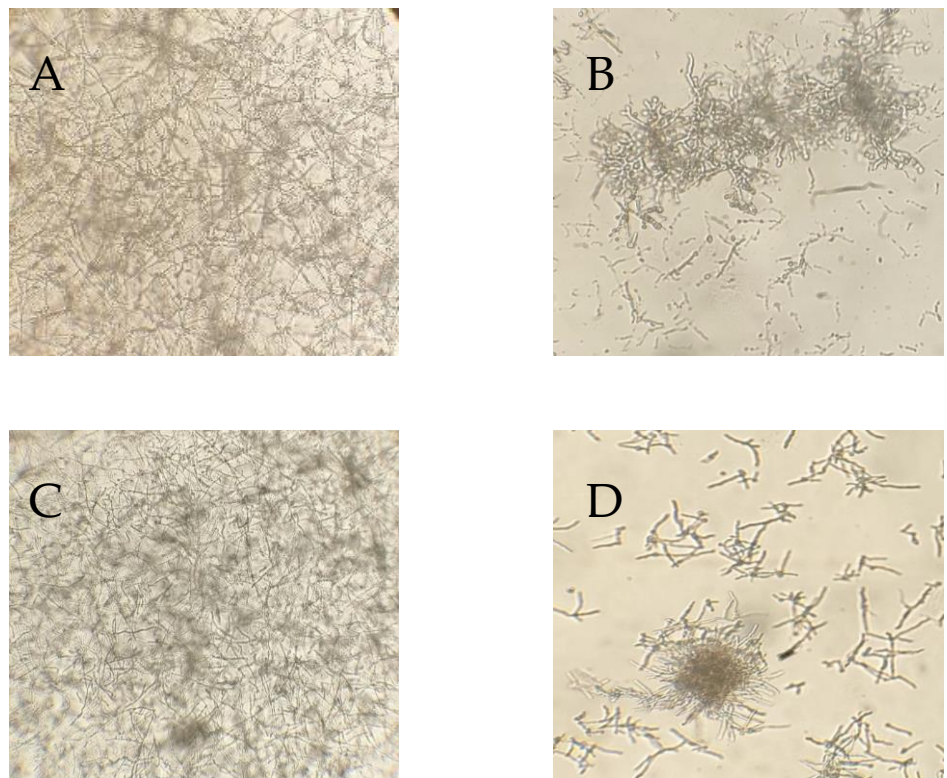

**Figure S1.** Fungal growth used for MECs determination. Magnification microscopy: 20x. (A). *P. variotii* (HEGP 5) control: uninhibited growth. (B) **Inhibition** of *P. variotii* (HEGP5) by 0.015 mg/l of anidulafungin (aberrant/blunted hyphal growth). (C) *P. lilacinum* (HEGP 20) control: uninhibited growth. (D) **Inhibition** *P. lilacinum* (HEGP 20) by 8 mg/l of anidulafungin (aberrant/blunted hyphal growth).
